# Supplementary material for: Synergistic roles of vapor- and liquid-phase epitaxy in the seed-mediated synthesis of substrate-based noble metal nanostructures
Source: Royal Society of Chemistry journal article supplement (doi:10.1039/d1nr07019c), 2021-01-01
Supplement: d1nr07019c1.pdf [file d1nr07019c1.pdf]

## Supporting Information

# Synergistic Roles of Vapor- and Liquid-Phase Epitaxy in the Seed-Mediated Synthesis of Substrate-Based Noble Metal Nanostructures

Spencer D. Golze,<sup>a,†</sup> Robert A. Hughes,<sup>a,†</sup> Eredzhep Menumerov,<sup>a</sup> Sergei Rouvimov,<sup>b</sup> and Svetlana Neretina<sup>\*a,c</sup>

<sup>a</sup> College of Engineering, University of Notre Dame, Notre Dame, Indiana, 46556, United States

<sup>b</sup> Notre Dame Integrated Imaging Facility (NDIIF), University of Notre Dame, Notre Dame, Indiana, 46556, United States

<sup>c</sup> Department of Chemistry and Biochemistry, University of Notre Dame, Notre Dame, Indiana, 46556, United States

\* E-mail: sneretina@nd.edu

† Equal Contribution

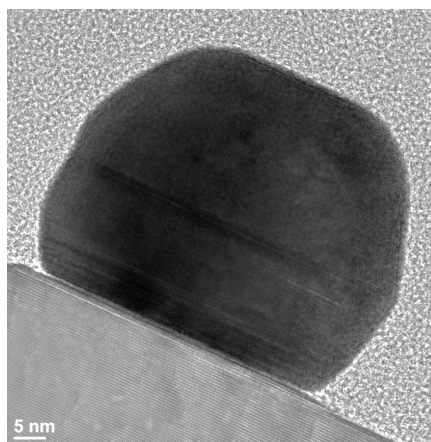

**Fig. S1.** TEM image of a Au seed on a sapphire substrate that shows stacking faults that extend from one side of the seed to the other.

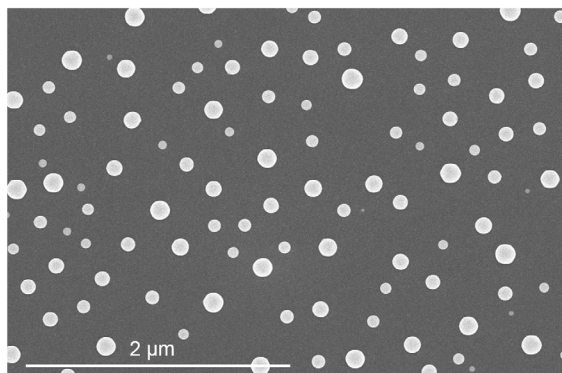

**Fig. S2.** SEM image of the Pt nanostructures that act as the core material for Pt@Ag core-shell structures.

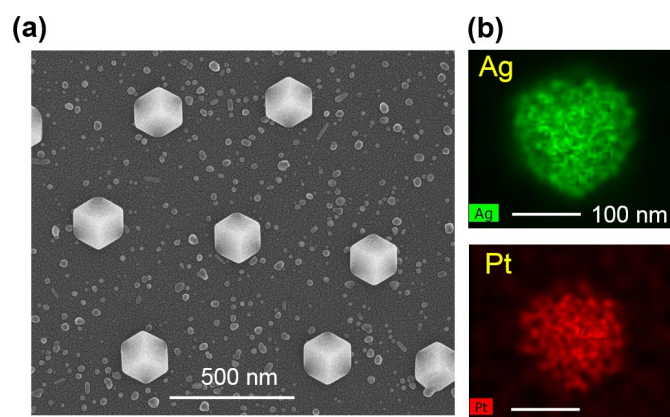

**Fig. S3.** (a) SEM image of Ag@Pt core-shell nanocubes formed on [0001]-oriented sapphire substrates that have their [111]-axis normal to the substrate surface. (b) EDS elemental maps for Ag and Pt.

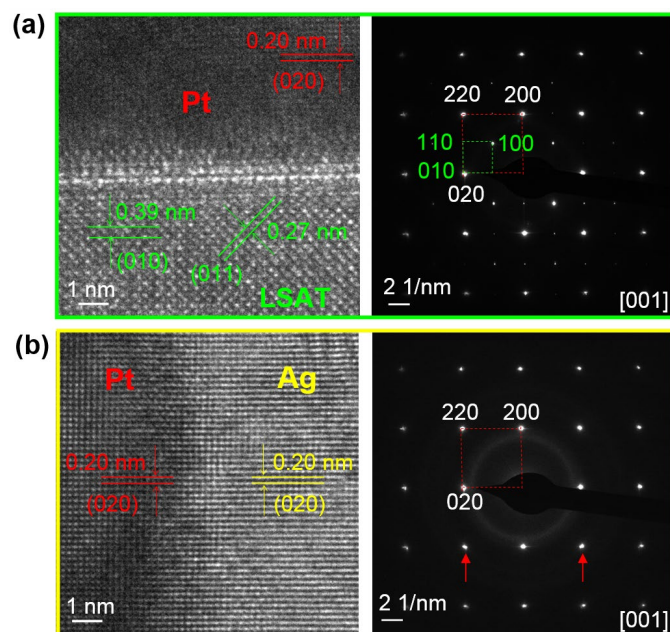

**Fig. S4.** HRTEM image and the corresponding SAED pattern for (a) Pt/LSAT and (b) Pt/Ag interfaces. It should be noted that the SAED pattern for the Ag/Pt interface shows reflections that exhibit a slight splitting (red arrows).
